# Supplementary material for: Mitochondrial dysfunction and lipometabolic disturbance induced by the co-effect of polystyrene nanoplastics and copper impede early life stage development of zebrafish (Danio rerio)
Source: Royal Society of Chemistry journal article supplement (doi:10.1039/d2en00710j), 2022-12-13
Supplement: d2en00710j1.pdf [file d2en00710j1.pdf]

### **Method of Cu Analysis**

Water samples were collected for Cu analysis at the beginning of the experiment, daily updates of the treatment solution and the end of the experiment. The sample was acidified (65 % HNO<sub>3</sub>) and stored at 4 °C until analysis. The Cu content in the water and in the digested samples was quantified using electrothermal atomic absorption spectrometry (Unicam 939 Spectrometer, GF90 furnace). All samples were analyzed repeatedly. The concentration of Cu in water was expressed as mean ± standard deviation (SD).

**Table S1 Primers used for mtDNA copy number analysis from zebrafish**

| <b>Gene</b>                                         | <b>Primer (5'-3')</b>            | <b>Amplicon size (bp)</b> | <b>Accession No.</b> |
|-----------------------------------------------------|----------------------------------|---------------------------|----------------------|
| <i>beta-2-microglobulin (b2m)</i>                   | F-<br>CTGCTGTTGTCCTGAATGC<br>T   | 131                       | ENSDART00000075127   |
|                                                     | R-<br>GAGTGGAGACTTTCCCCTG<br>T   |                           |                      |
| <i>NADH dehydrogenase 1, mitochondrial (mt-nd1)</i> | F-<br>ACAGCTCAGGAAGACACA<br>TGAC | 93                        | ENSDART00000093596   |
|                                                     | R-<br>CGGTGCTCGGTTTGTCT<br>G     |                           |                      |

**Table S2 Primers used for RT-qPCR analysis from zebrafish**

| <b>Gene</b>                                                                                  | <b>Primer (5'-3')</b>              | <b>Amplicon size (bp)</b> | <b>Accession No.</b>   |
|----------------------------------------------------------------------------------------------|------------------------------------|---------------------------|------------------------|
| <i>peroxisome proliferator activated receptor <math>\gamma</math> coactivator-1a (pgc1a)</i> | F-<br>AGATGAGGAAAATGAGGC<br>CAA    | 137                       | XM_017357140<br>.2     |
|                                                                                              | R-<br>GACAGCTCTGATCACTGGC<br>A     |                           |                        |
| <i>mitofusin 1a (mfn1a)</i>                                                                  | F-<br>AGACTCGGAGGAGAGGAA<br>GG     | 106                       | NM_200647.1            |
|                                                                                              | R-<br>AGGCCAAAACACTCGAACC<br>A     |                           |                        |
| <i>mitofusin 1b (mfn1b)</i>                                                                  | F-<br>CTGTCAGTCAGTCGGTGTG<br>T     | 146                       | XM_017358379<br>.2     |
|                                                                                              | R-<br>GCGCTTTAACGGAGAGGGA<br>T     |                           |                        |
| <i>mitofusin 2 (mfn2)</i>                                                                    | F-<br>TGGCAGGGATTGGTGAAGT<br>C     | 73                        | NM_001128254<br>.2     |
|                                                                                              | R-<br>TTCCGTTACTGGTCCTGCC          |                           |                        |
| <i>dynamin-related protein 1 (drp1)</i>                                                      | F-<br>CGATCCTCTTGGCGGACTT<br>A     | 123                       | NM_200922.1            |
|                                                                                              | R-<br>TTCACCTGCCTCTTCACCA<br>G     |                           |                        |
| <i>ATP synthase <math>\delta</math>, mitochondria 1 (mt-atp8)</i>                            | F-<br>TCAGCTTAATCCAAAACCC<br>TGA   | 114                       | ENSDARG0000<br>0063910 |
|                                                                                              | R-<br>ACTTGAGTTGGGTCATTAG<br>GTTGA |                           |                        |
| <i>cytochrome c oxidase I, mitochondria 1 (mt-co1)</i>                                       | F-<br>ATTCCACATCCAACCCCTG<br>C     | 104                       | ENSDART0000<br>0093606 |
|                                                                                              | R-<br>TTGATGGCAGCTCTAGTTG<br>GG    |                           |                        |

|                                                        |                                   |     |                        |
|--------------------------------------------------------|-----------------------------------|-----|------------------------|
| <i>cytochrome b, mitochondria l (mt-cyb)</i>           | F-<br>GGCCTAAACCCCAACATGG<br>A    | 158 | ENSDART0000<br>0093625 |
|                                                        | R-<br>AGAGGGTTAGCAGGGGTG<br>AA    |     |                        |
| <i>NADH dehydrogenase 2, mitochondria l (mt-nd2)</i>   | F-<br>TGGAGGGTGAAGCGGACTT<br>A    | 116 | ENSDART0000<br>0093600 |
|                                                        | R-<br>TCAGAGTAAGTTGCGGAGC<br>G    |     |                        |
| <i>NADH dehydrogenase 4l, mitochondria l (mt-nd4l)</i> | F-<br>GACACCCACGCACTTTAGT<br>C    | 250 | ENSDART0000<br>0093617 |
|                                                        | R-<br>GGTTCGAGCTGTGGCTACT<br>A    |     |                        |
| <i>NADH dehydrogenase 5, mitochondria l (mt-nd5)</i>   | F-<br>ACCACCTCCCATCTTAACG<br>C    | 111 | ENSDART0000<br>0093622 |
|                                                        | R-<br>TCGGGGGCTTCCTAACAG<br>A     |     |                        |
| <i>NADH dehydrogenase 6, mitochondria l (mt-nd6)</i>   | F-<br>AGCACGAAGCACACCATA<br>ACT   | 136 | ENSDART0000<br>0093623 |
|                                                        | R-<br>AGCTGATGTAAGCGGGGTT<br>G    |     |                        |
| <i>fatty acid binding protein 1b (fabp1b)</i>          | F-<br>AAGCTGAAGGTGGTGCTGA<br>A    | 153 | DQ062096.1             |
|                                                        | R-<br>GTCTTGCGTGTGTTTGCTCA        |     |                        |
| <i>fatty acid binding protein 2 (fabp2)</i>            | F-<br>GCCCATGACAACCTGAAGA<br>T    | 199 | AY266452.1             |
|                                                        | R-<br>TGCCTTGCGTGTGAAAGT<br>C     |     |                        |
| <i>fatty acid binding protein 3</i>                    | F-<br>TGGTAAAATGGTTATGACC<br>TTGA | 248 | NM_152961.3            |

|                                                                 |                                    |     |                    |
|-----------------------------------------------------------------|------------------------------------|-----|--------------------|
| <i>(fabp3)</i>                                                  | R-<br>CCCACCACCATCCATCATT          |     |                    |
| <i>fatty acid binding protein 6 (fabp6)</i>                     | F-<br>GCTGACCATAAGCTTCCCC<br>A     | 70  | NM_001002076<br>.2 |
|                                                                 | R-<br>GGAGGTCTCCACCAGC<br>TTTC     |     |                    |
| <i>fatty acid binding protein 7a (fabp7a)</i>                   | F-<br>ATGGTAAAATGGTTATGAC<br>CTTGA | 245 | NM_131605.2        |
|                                                                 | R-<br>CCACCATCCATCATTGACA<br>TTCT  |     |                    |
| <i>fatty acid binding protein 10a (fabp10a)</i>                 | F-<br>TCTCCAGAAAGCATGGCCT          | 269 | NM_152960.1        |
|                                                                 | R-<br>TCCAGCTTGACGATGCACT<br>T     |     |                    |
| <i>apolipoprotein A-Ib (apoA1b)</i>                             | F-<br>CAGCCACATCCACAGATCC<br>A     | 177 | NM_001100144<br>.2 |
|                                                                 | R-<br>TGAGTGAGGGACTTGTGTG<br>C     |     |                    |
| <i>adipose triglyceride lipase (atgl)</i>                       | F-<br>GCGTGACGGATGGAGAAA           | 102 | XM_005174256<br>.4 |
|                                                                 | R-<br>AGGCCACAGTAAACAGGA<br>ATAT   |     |                    |
| <i>carnitine palmitoyltransferase 1 (cpt1)</i>                  | F-<br>CATCCTTAGGCCTGCTCTTC<br>AAA  | 94  | NM_001044854<br>.1 |
|                                                                 | R-<br>ACCATGACACCCCCAACTA<br>ACAT  |     |                    |
| <i>peroxisome proliferator-activated receptor alpha (ppara)</i> | F-<br>ACAGTGCGCTGTTCGTCAG          | 153 | NM_001102567<br>.1 |
|                                                                 | R-<br>CAGGGGTCAGAGCATCCAG          |     |                    |
| <i>peroxisome proliferator-</i>                                 | F-<br>AATTCGCCAAGAGCATCCC          | 109 | NM_131467.1        |

|                                                                                  |                                    |     |                    |
|----------------------------------------------------------------------------------|------------------------------------|-----|--------------------|
| <i>activated<br/>receptor<br/>gamma<br/>(ppary)</i>                              | G                                  |     |                    |
|                                                                                  | R-<br>ATGAGCGGAGAAATCATG<br>ATGATC |     |                    |
| <i>sterol<br/>regulatory<br/>element<br/>binding<br/>proteins1c<br/>(srebp1)</i> | F-<br>CTAATGGCAGGAGCCAGTC<br>C     | 161 | NM_001105129<br>.1 |
|                                                                                  | R-<br>GATGGAGGCAGAAACCGA<br>CA     |     |                    |
| <i>β-actin</i>                                                                   | F-<br>CGAGCTGTCTTCCCATCCA          | 86  | AF025305.1         |
|                                                                                  | R-<br>TCACCAACGTAGCTGTCTT<br>TCTG  |     |                    |
